# Supplementary material for: Identification of SWI/SNF Subcomplex GBAF Presence, Intra-Complex Interactions, and Transcriptional Dynamics during Early Porcine Development
Source: MDPI journal article supplement (doi:10.3390/ani14050773), 2024-02-29
Supplement: s1 [file s1]

## Supplementary Materials

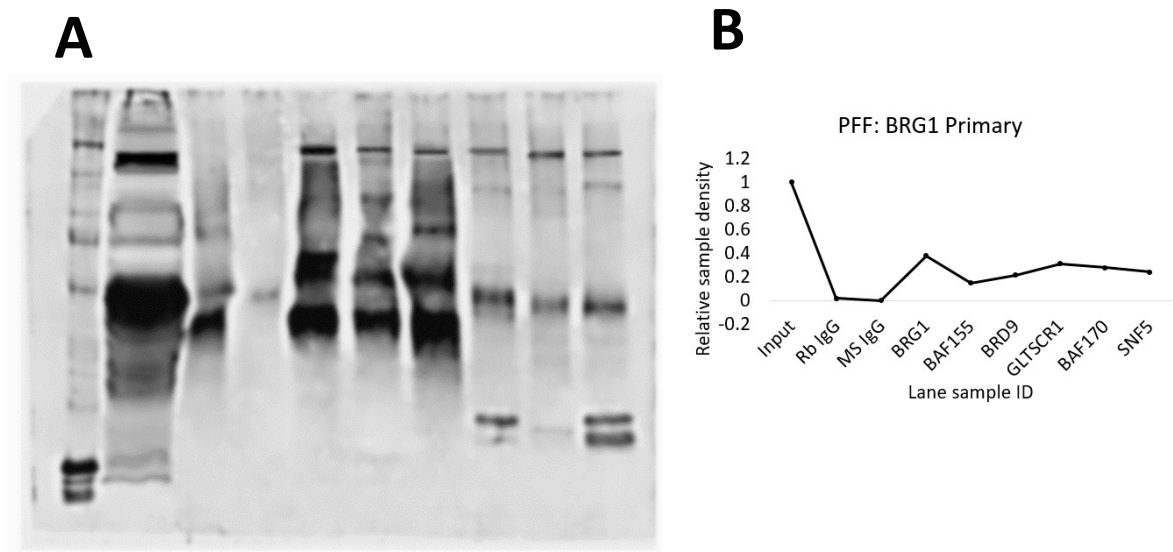

**Figure S1.** GBAF subunit signal is co-enriched with BRG1 in PFF cells. (A) Co-IP of (starting in lane 5) BRG1, BAF155, BRD9, GLTSCR1, BAF170, and SNF5 with BRG1 primary antibody. (B) Accompanying relative signal density plot for BRG1 primary blot.

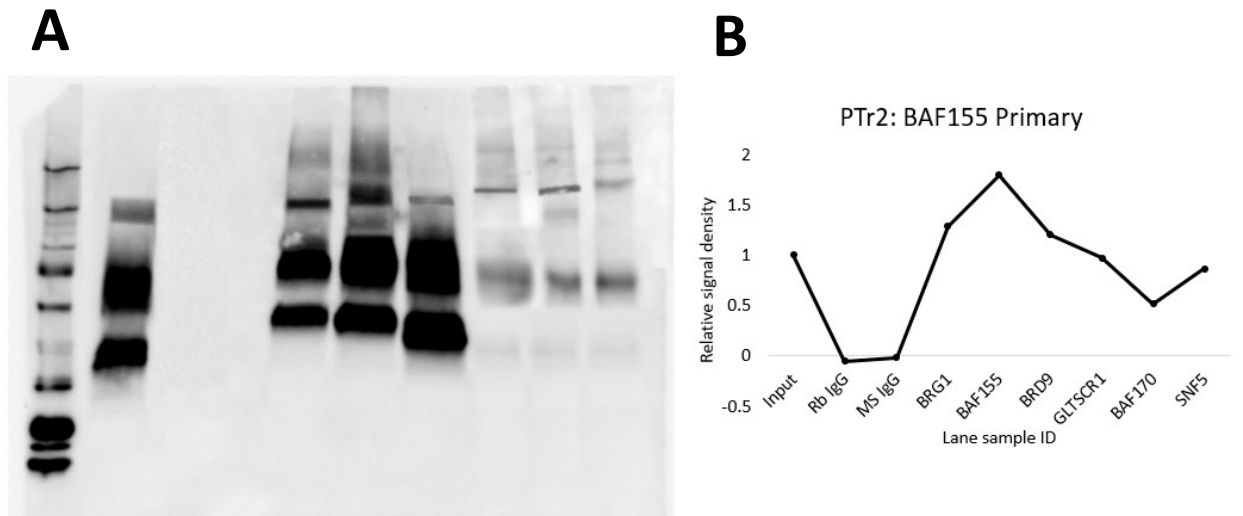

**Figure S2.** GBAF subunit signal is co-enriched with BAF155 in PFF cells. (A) Co-IP of (starting in lane 5) BRG1, BAF155, BRD9, GLTSCR1, BAF170, and SNF5 with BRG1 primary antibody. (B) Accompanying relative signal density plot for BAF155 primary blot.

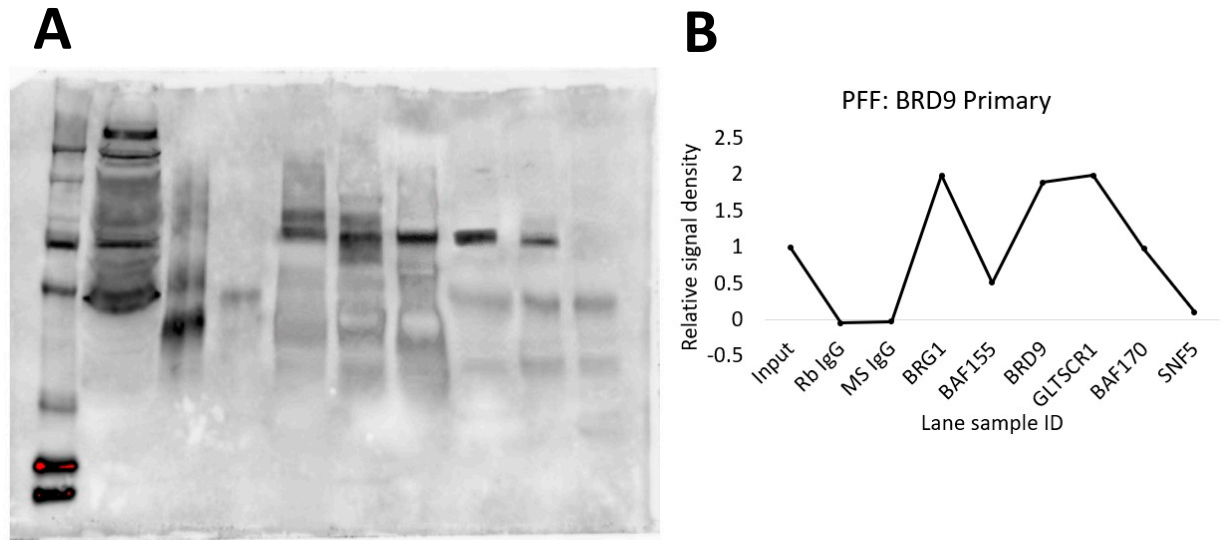

**Figure S3.** GBAF subunit BRD9 is detectable in PFF cells. **(A)** Co-IP of (starting in lane 5) BRG1, BAF155, BRD9, GLTSCR1, BAF170, and SNF5 with BRG1 primary antibody. **(B)** Accompanying relative signal density plot for BRD9 primary blot.

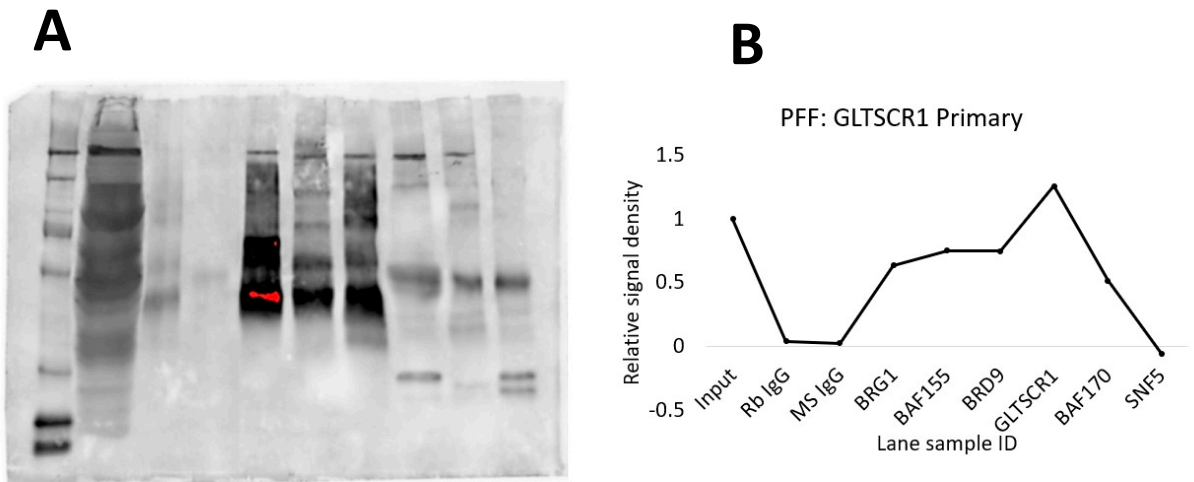

**Figure S4.** GBAF subunit GLTSCR1 is detectable in PFF cells. **(A)** Co-IP of (starting in lane 5) BRG1, BAF155, BRD9, GLTSCR1, BAF170, and SNF5 with BRG1 primary antibody. **(B)** Accompanying relative signal density plot for GLTSCR1 primary blot.

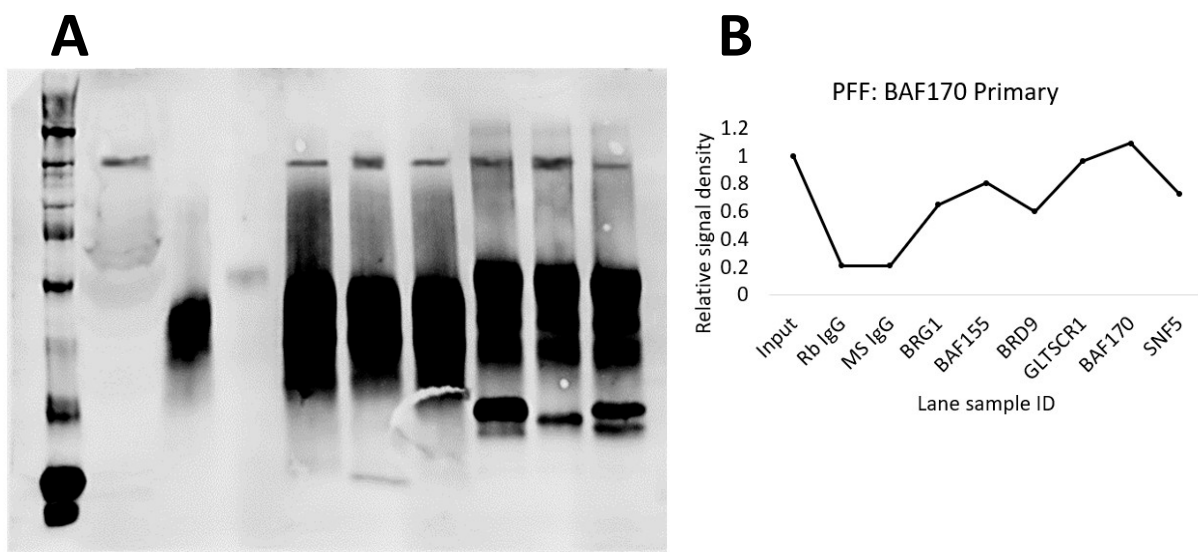

**Figure S5.** GBAF subunits BRD9 and GLTSCR1 are co-enriched with BAF170 in PFF cells. **(A)** Co-IP of (starting in lane 5) BRG1, BAF155, BRD9, GLTSCR1, BAF170, and SNF5 with BRG1 primary antibody. **(B)** Accompanying relative signal density plot for BAF170 primary blot.

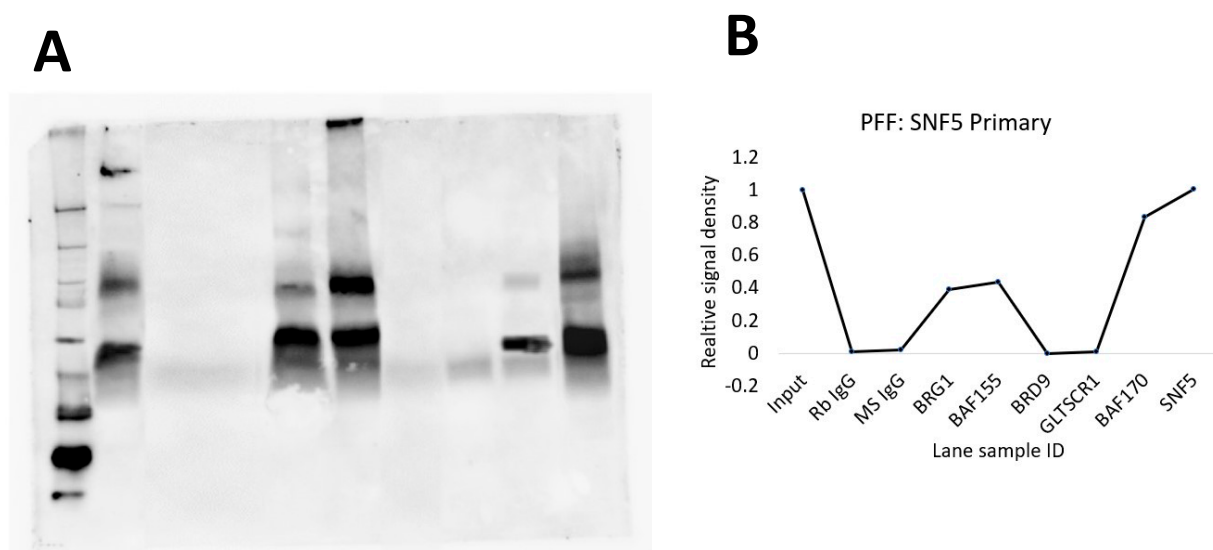

**Figure S6.** GBAF subunits BRD9 and GLTSCR1 are not co-enriched with SNF5 in PFF cells. **(A)** Co-IP of (starting in lane 5) BRG1, BAF155, BRD9, GLTSCR1, BAF170, and SNF5 with BRG1 primary antibody. **(B)** Accompanying relative signal density plot for SNF5 primary blot.

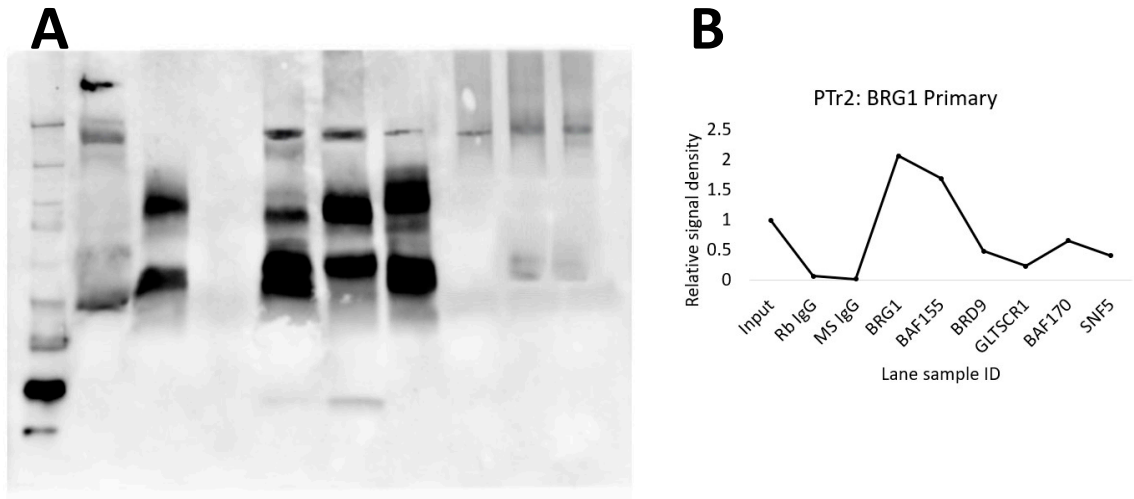

**Figure S7.** GBAF subunit signal is co-enriched with BRG1 in PTr2 cells. (A) Co-IP of (starting in lane 5) BRG1, BAF155, BRD9, GLTSCR1, BAF170, and SNF5 with BRG1 primary antibody. (B) Accompanying relative signal density plot for BRG1 primary blot.

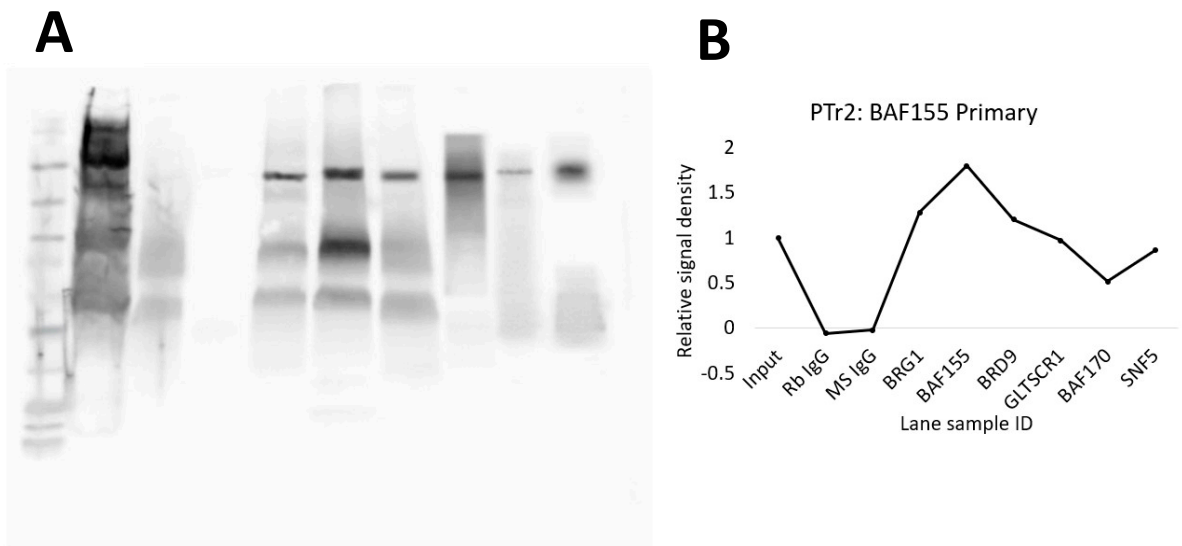

**Figure S8.** GBAF subunit signal is co-enriched with BAF155 in PTr2 cells. (A) Co-IP of (starting in lane 5) BRG1, BAF155, BRD9, GLTSCR1, BAF170, and SNF5 with BRG1 primary antibody. (B) Accompanying relative signal density plot for BAF155 primary blot.

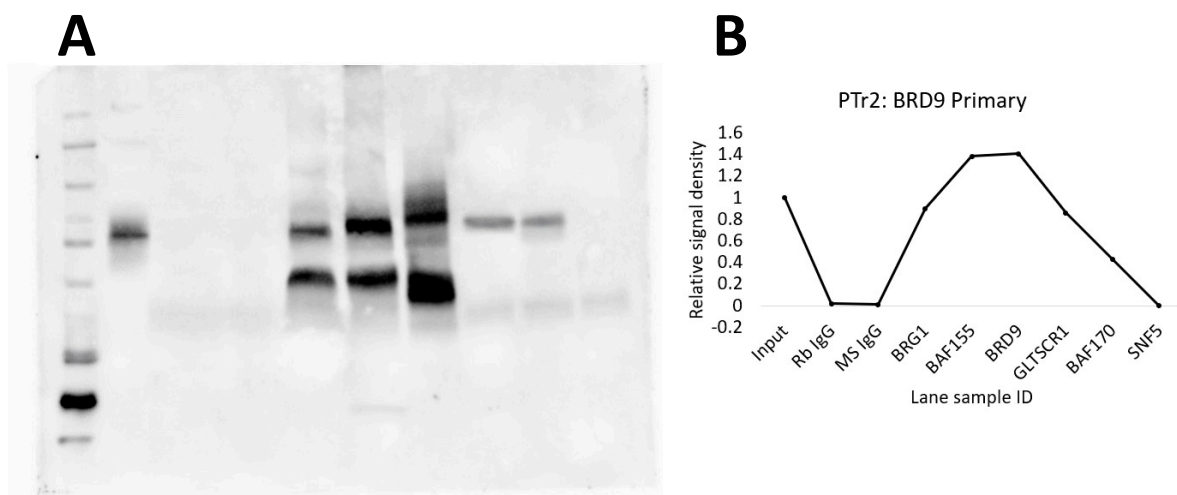

**Figure S9.** GBAF subunit BRD9 is detectable in PTTr2 cells. **(A)** Co-IP of (starting in lane 5) BRG1, BAF155, BRD9, GLTSCR1, BAF170, and SNF5 with BRG1 primary antibody. **(B)** Accompanying relative signal density plot for BRD9 primary blot.

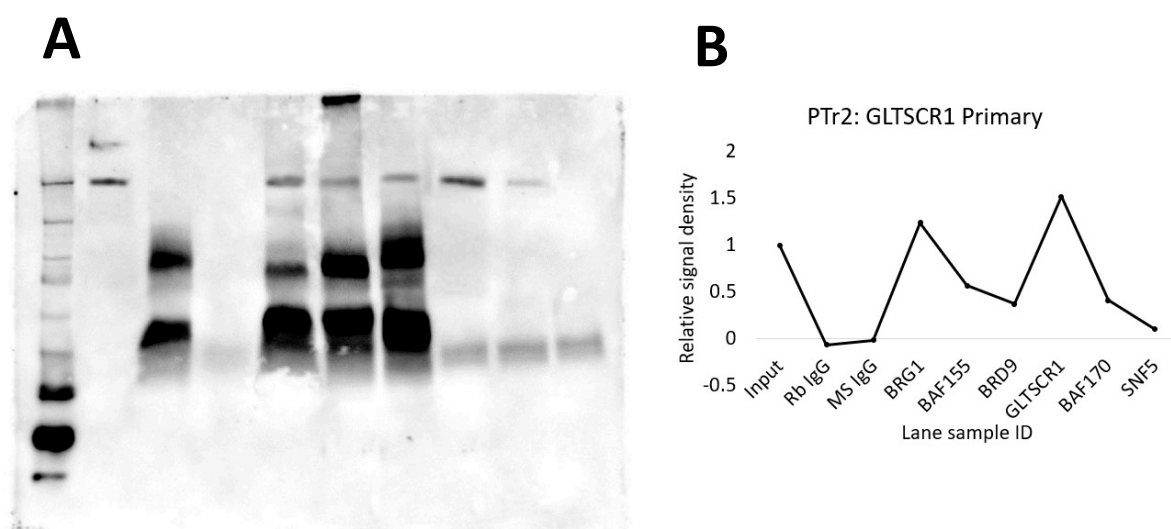

**Figure S10.** GBAF subunit GLTSCR1 is detectable in PTTr2 cells. **(A)** Co-IP of (starting in lane 5) BRG1, BAF155, BRD9, GLTSCR1, BAF170, and SNF5 with BRG1 primary antibody. **(B)** Accompanying relative signal density plot for GLTSCR1 primary blot.

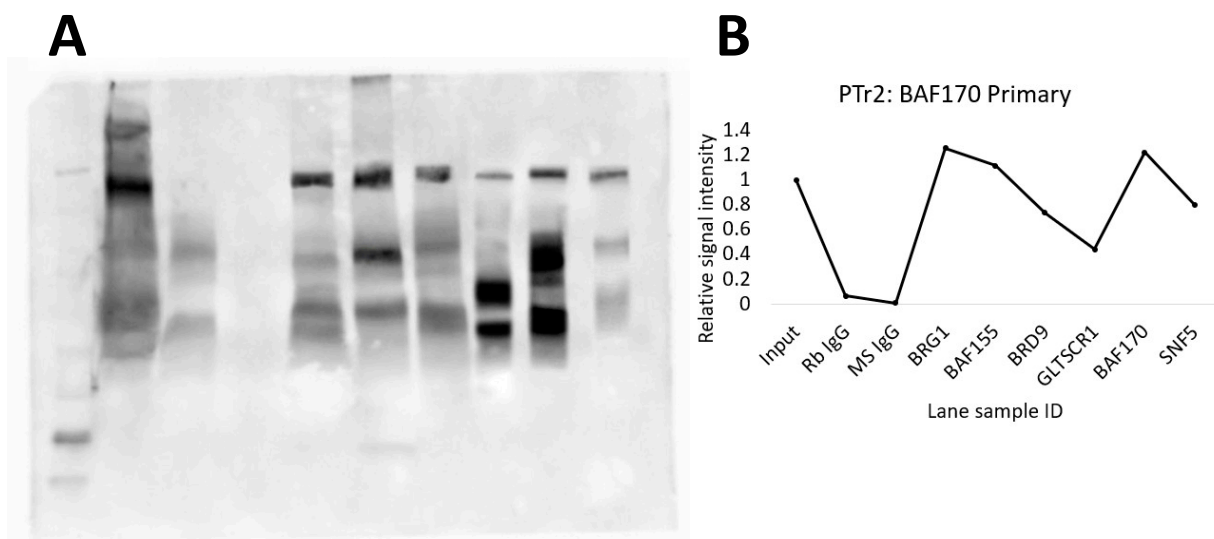

**Figure S11.** GBAF subunits BRD9 and GLTSCR1 are co-enriched with BAF170 in PTr2 cells. **(A)** Co-IP of (starting in lane 5) BRG1, BAF155, BRD9, GLTSCR1, BAF170, and SNF5 with BRG1 primary antibody. **(B)** Accompanying relative signal density plot for BAF170 primary blot.

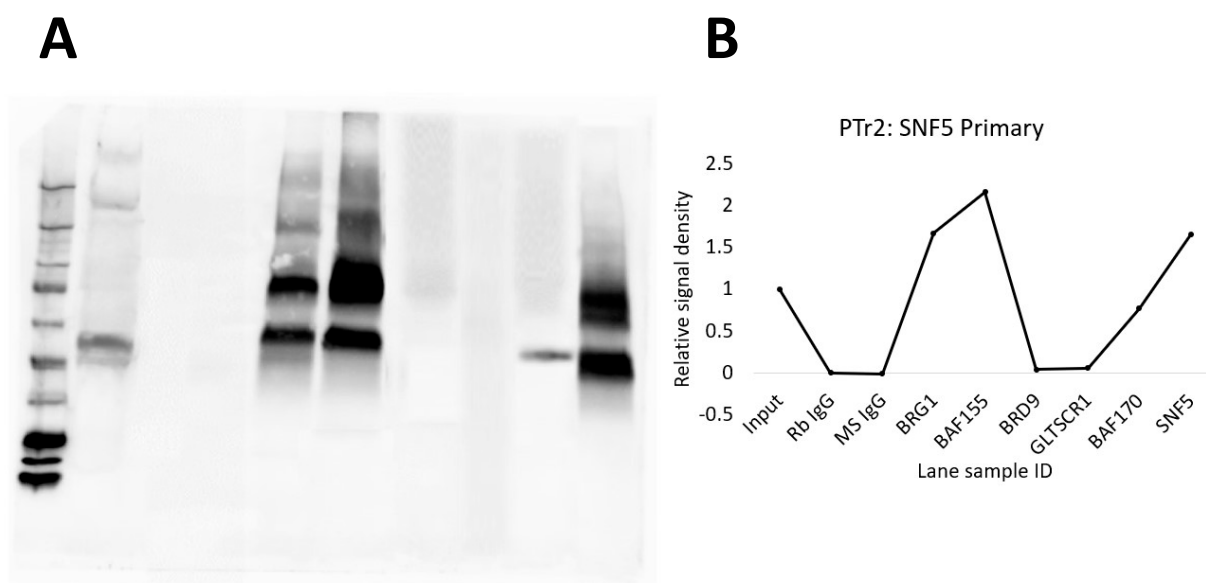

**Figure S12.** GBAF subunits BRD9 and GLTSCR1 are not co-enriched with SNF5 in PTr2 cells. **(A)** Co-IP of (starting in lane 5) BRG1, BAF155, BRD9, GLTSCR1, BAF170, and SNF5 with BRG1 primary antibody. **(B)** Accompanying relative signal density plot for SNF5 primary blot.
